# Supplementary material
Source: publisher figshare collection journal article supplement (https://acs.figshare.com/ndownloader/files/7356478)
Supplement: Supplementary file 1 [file 7356478]

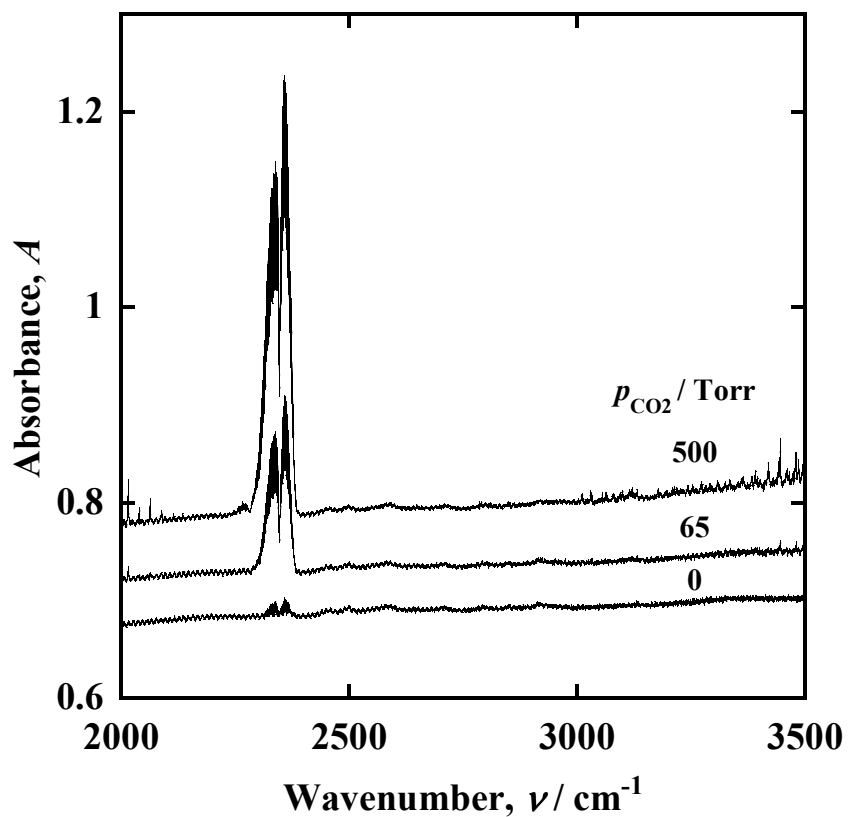

**Figure S1.** IR spectra of ZOTW<sub>2.5</sub> under CO<sub>2</sub> gas. CO<sub>2</sub> pressure,  $p_{\text{CO}_2}/\text{Torr}$ : lower, 0; middle, 65; upper, 500. A new peak (2276 cm<sup>-1</sup>) for adsorbed CO<sub>2</sub> species appeared under CO<sub>2</sub> of 500 Torr. No peak for the adsorbed CO<sub>2</sub> species appeared at 65 Torr, because amount of CO<sub>2</sub> adsorbed was much less than that at 500 Torr, as Figure 5 shows. The small peak of CO<sub>2</sub> gas (2349 cm<sup>-1</sup>) in the IR spectrum at  $p_{\text{CO}_2}/\text{Torr} = 0$  (in vacuum) arises from CO<sub>2</sub> gas in air along the light path in the IR equipment.
